# Supplementary material for: Curcumin affords protection against valproic acid induced teratogenicity by curtailing oxidative stress and inhibiting CYP2C9 activity
Source: Royal Society of Chemistry journal article supplement (doi:10.1039/c5ra13569a), 2015-01-01

## Supplementary Information (S.I.)

### S.I. Table

**S.I. Table 1: Changes in various biochemical parameters among dams of control and various treated groups**

| Treatment Groups                              | Antioxidative parameter in the liver of dams |                             |                           |                                 |                              |
|-----------------------------------------------|----------------------------------------------|-----------------------------|---------------------------|---------------------------------|------------------------------|
|                                               | ROS<br>(unit /min/mg protein)                | TBARS<br>(nM/mg of protein) | GSH<br>(nM/mg of protein) | Catalase<br>(µm/min/mg protein) | SOD<br>(Unit/min/mg Protein) |
| <b>Group I Control (1% GA)</b>                | 114.83 ± 2.12                                | 38.68 ± 0.64                | 0.35 ± 0.01               | 4.40 ± 0.20                     | 8.41± 0.14                   |
| <b>Group II VPA-300</b>                       | 388.58 ±2.94***                              | 50.84 ± 0.46***             | 0.09 ± 0.03***            | 2.49 ± 0.20***                  | 6.88 ± 0.11***               |
| <b>Group III sub-group-I Cur-100</b>          | 114.08 ±2.33                                 | 34.97 ± 1.27                | 0.36 ± 0.02               | 5.44 ± 0.28***                  | 8.55 ± 0.20                  |
| <b>sub-group-II Cur-150</b>                   | 111.88 ±0.90                                 | 32.47 ± 3.76*               | 0.41 ± 0.04*              | 5.54 ± 0.23***                  | 8.58 ± 0.18                  |
| <b>sub-group-III Cur-200</b>                  | 99.96 ±4.55**                                | 18.64 ± 0.54***             | 0.42 ± 0.03**             | 5.70 ± 0.19***                  | 8.62 ± 0.13                  |
| <b>Group IV sub-group-I VPA-300 + Cur-100</b> | 373.92 ±8.29###                              | 39.90 ± 4.37###             | 0.10 ± 0.04               | 2.63 ± 0.19                     | 7.16 ± 0.07 <sup>#</sup>     |
| <b>sub-group-II VPA-300 + Cur-150</b>         | 230.33 ±8.64###                              | 35.99 ± 4.06###             | 0.16 ± 0.02 <sup>##</sup> | 2.93 ± 0.49                     | 7.75 ± 0.27###               |
| <b>sub-group-III VPA-300 + Cur-200</b>        | 187.8 ±6.43###                               | 22.97 ± 1.93###             | 0.20 ± 0.02###            | 3.64 ± 0.11 <sup>##</sup>       | 8.02 ± 0.18###               |

- Comparison of Group I with Group II and Group III - \*\*\*p < 0.001, \*\*p < 0.01, \*p < 0.05, non-significant >0.05
- Comparison of Group II with Various sub-groups of Group IV - ###p < 0.001, ##p < 0.01, #p < 0.05, non-significant >0.05

## S.I. Figure

**S.I. Figure 1: Graph showing body weight gain among dams of control and other groups / subgroups treated with Valproic acid, various doses of curcumin and combination of these two. The results are expressed as mean  $\pm$ SD.**

**a – Body weight gain of dams followed till day 20 of gestation and**

**b -Body weight gain of dams followed till day 15 of gestation**

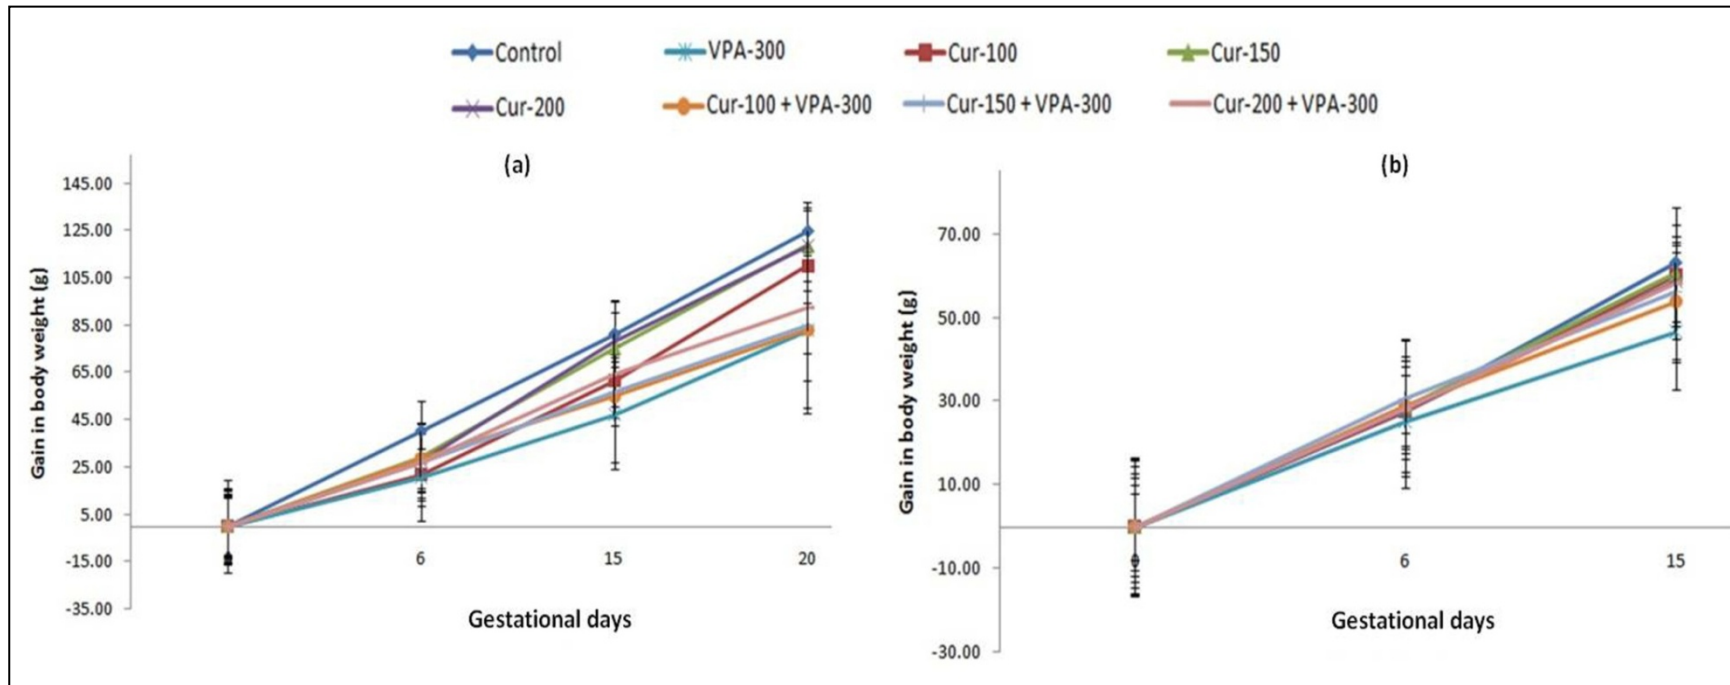

**S.I. Figure 2: Changes in foetal weight, crown to rump length and in resorptions among the dams of various groups and sub-groups. (\* denoting significance i.e.  $*p < 0.05$  = less significant,  $**p < 0.01$  – significant,  $***p < 0.001$  = highly significant and  $>0.05$ =non significant (NS)).**

**(# - % reduction in resorption among the dams of various sub-groups of Group IV in respect to Group II has been calculated to be 35.71, 42.85 and 71.42 respectively)**

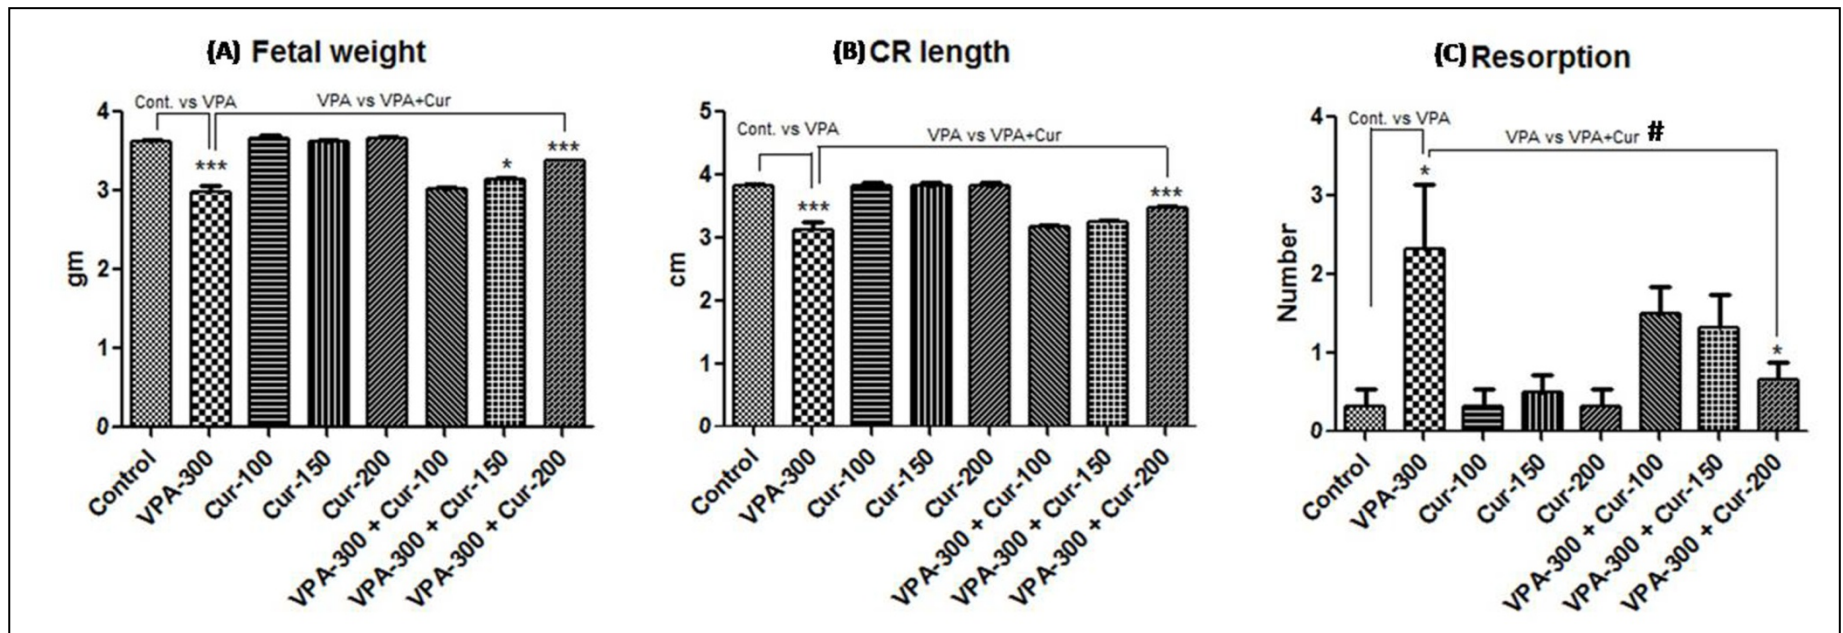

**S.I. Figure 3: Showing food consumption among dams of control and various Treated groups sacrificed on day 20<sup>th</sup> of gestation**

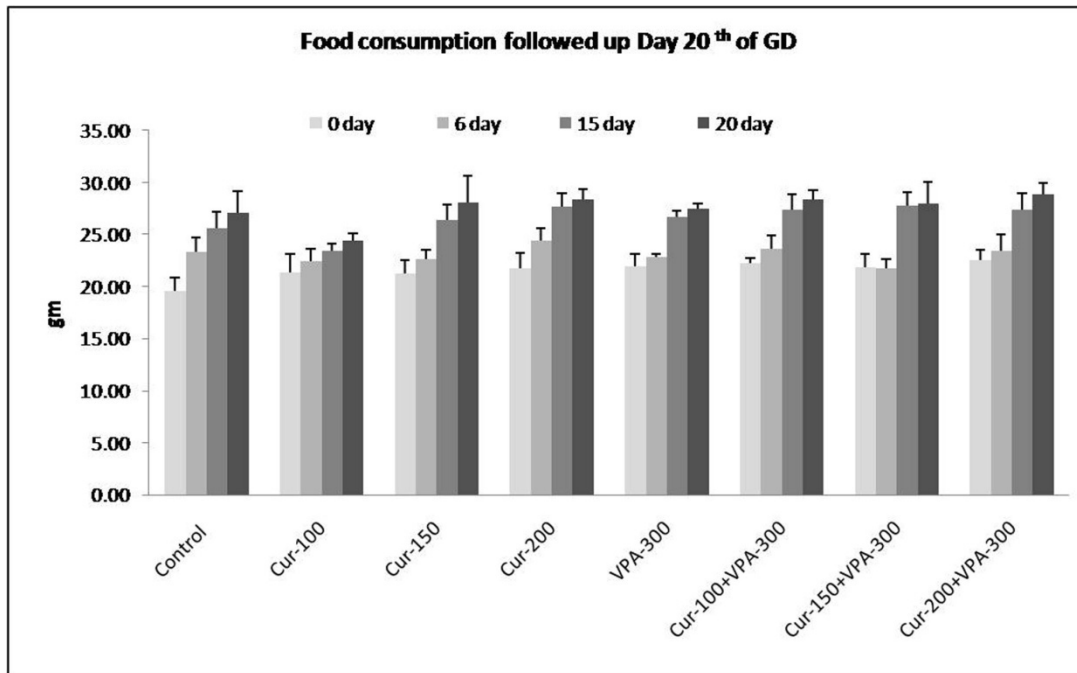

**S.I. Figure 4: Showing food consumption among dams of control and various Treated groups sacrificed on day 15<sup>th</sup> of gestation**

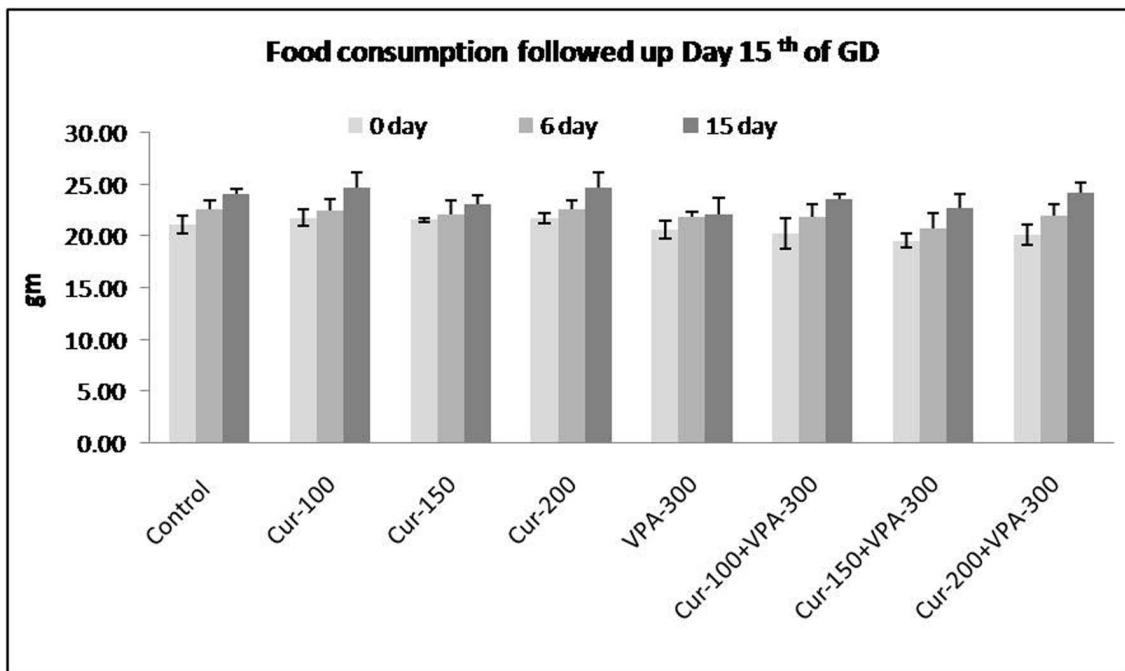

**S.I. Figure 5: Showing water consumption among dams of control and various Treated groups sacrificed on day 20<sup>th</sup> of gestation**

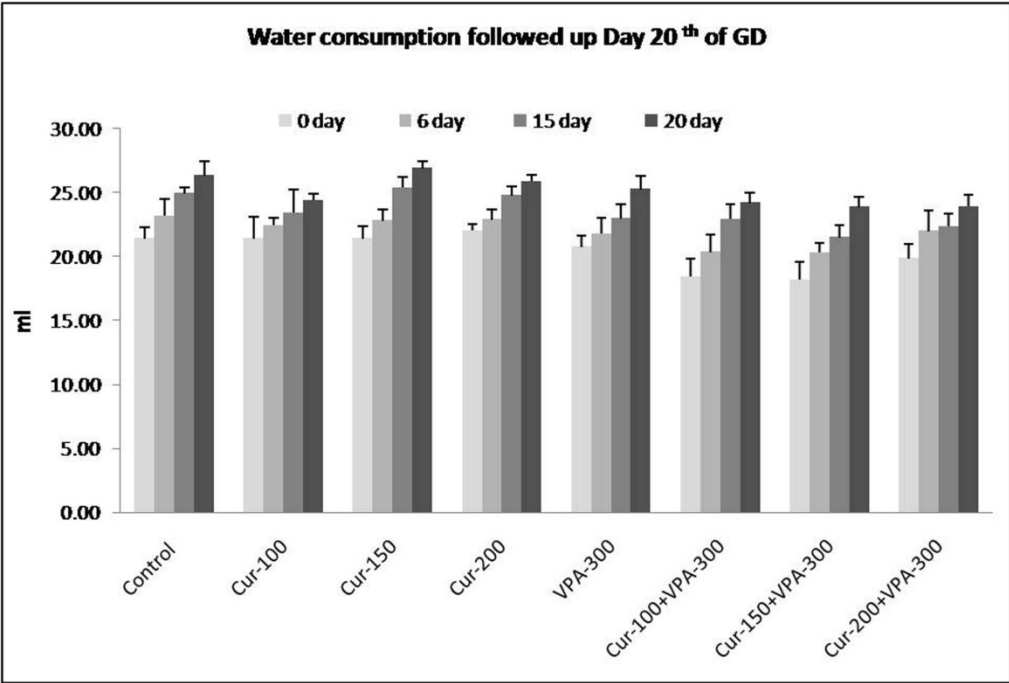

**S.I. Figure 6: Showing water consumption among dams of control and various Treated groups sacrificed on day 15<sup>th</sup> of gestation**

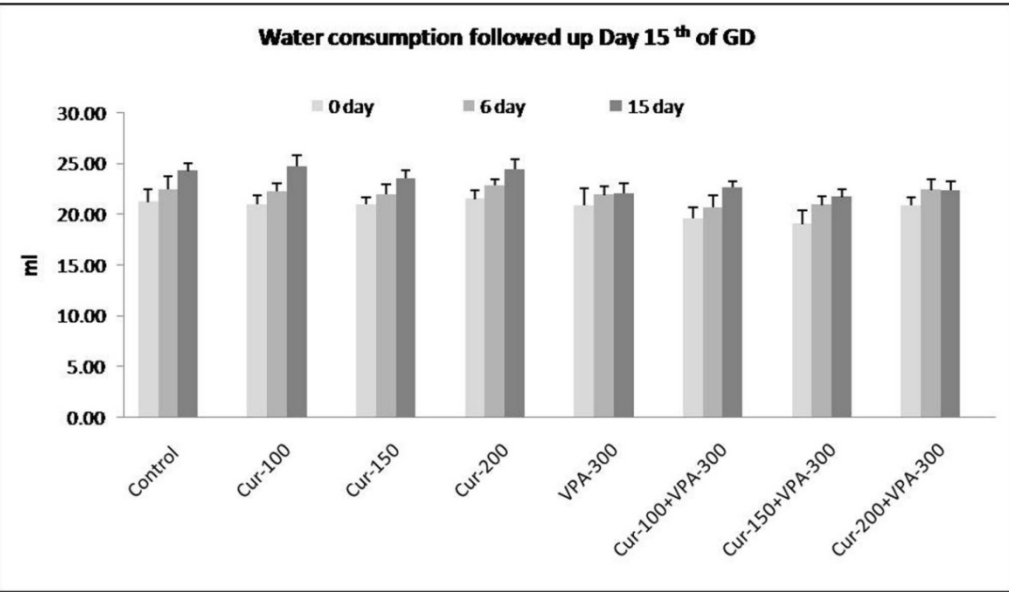

Supplement: c5ra13569a1.pdf [file c5ra13569a1.pdf]
